# Supplementary material for: Mucosal associated invariant T cells from human breast ducts mediate a Th17-skewed response to bacterially exposed breast carcinoma cells
Source: PubMed Central journal article supplement (PMC6134631; doi:10.1186/s13058-018-1036-5), 2018-09-12

# Figure S1

## A

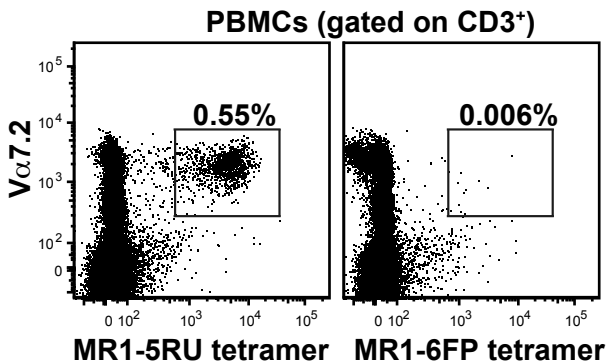

## B

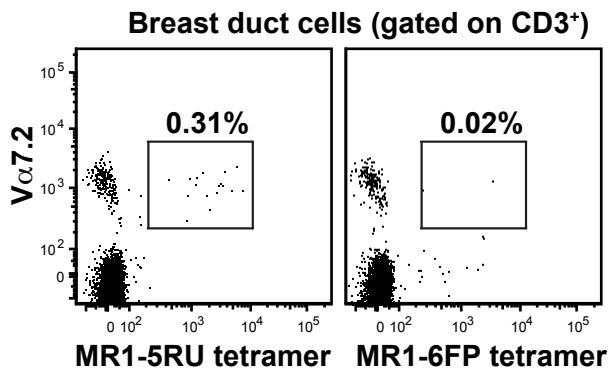

Supplement: 13058_2018_1036_MOESM2_ESM.pdf [file 13058_2018_1036_MOESM2_ESM.pdf]
