# Supplementary material for: Mucosal associated invariant T cells from human breast ducts mediate a Th17-skewed response to bacterially exposed breast carcinoma cells
Source: Springer Nature journal article supplement (doi:10.1186/s13058-018-1036-5), 2018-09-12

# Figure S4

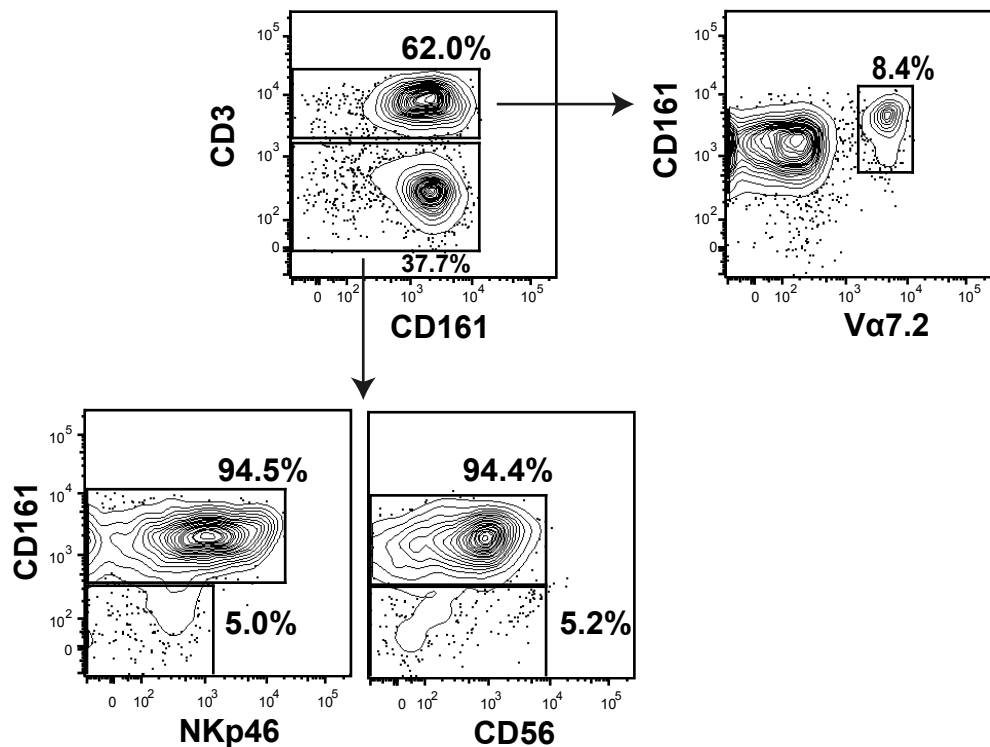

Supplement: MOESM1 [file 16117734]
